# Supplementary material
Source: PubMed Central journal article supplement (PMC7716348)
Supplement: jf0c05890_si_001.pdf [file jf0c05890_si_001.pdf]

1 **Interindividual differences in human intestinal microbial conversion**  
2 **of (-)-epicatechin to bioactive phenolics**

3 Chen Liu,<sup>\*,†</sup> Jacques Vervoort,<sup>‡</sup> Karsten Beekmann,<sup>†,§</sup> Marta Baccaro,<sup>†</sup>  
4 Lenny Kamelia,<sup>†</sup> Sebas Wesseling,<sup>†</sup> Ivonne M.C.M. Rietjens<sup>†</sup>

5 <sup>†</sup> Division of Toxicology, Wageningen University and Research, Wageningen, The Netherlands

6 <sup>‡</sup> Laboratory of Biochemistry, Wageningen University and Research, Wageningen, The  
7 Netherlands

8 <sup>§</sup> Present address: Wageningen Food Safety Research, PO Box 230, 6700 AE Wageningen, The  
9 Netherlands

10

11 **Supporting information**

12

13 **Table S1.** The limit of detection (LOD) and the limit of quantification (LOQ) of EC  
 14 and its major colonic metabolites in LC-TQ-MS.

| Compound | EC    | 3,4-<br>diHP<br>V | 3-HPV | 3,4-<br>diHPV<br>A | 3-<br>HPV<br>A | 3,4-<br>diHPPA | 3-<br>HPPA | 3-<br>HPAA | 4-<br>HPA<br>A | Catechol |
|----------|-------|-------------------|-------|--------------------|----------------|----------------|------------|------------|----------------|----------|
| LOD (nM) | 88.05 | 27.83             | 50.89 | 25.07              | 31.60          | 443.15         | 468.66     | 67.20      | 25.83          | 74.56    |
| LOQ (nM) | 266.8 | 84.32             | 154.2 | 75.98              | 95.76          | 1342.8         | 1420.1     | 203.6      | 78.28          | 225.93   |
|          | 3     |                   | 0     |                    |                | 7              | 8          | 4          |                |          |

15

16

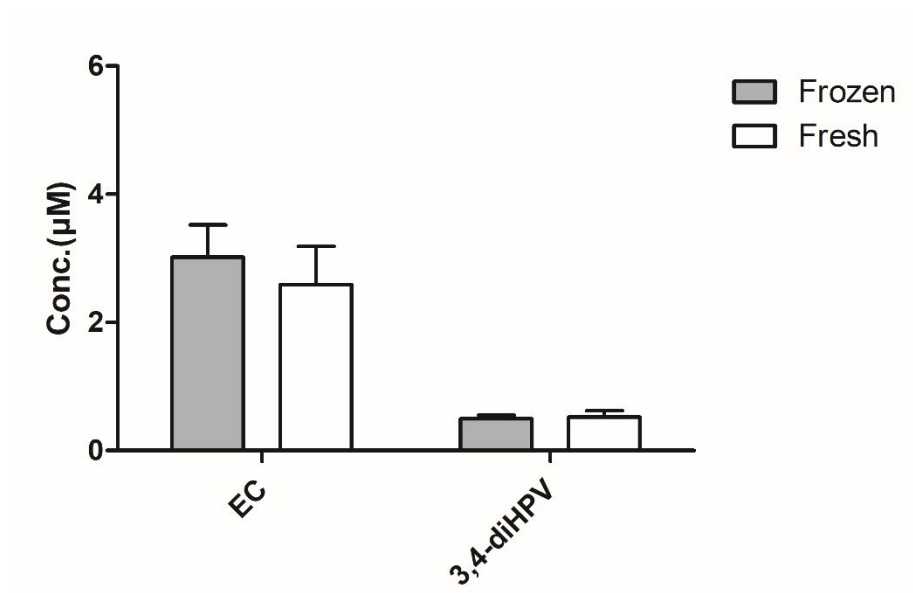

17

18 **Figure S1.** Residual EC and 3,4-diHPV formed in incubations with the fresh faecal  
19 slurry and the same faecal slurry but frozen for 1 week prior to incubation.

20

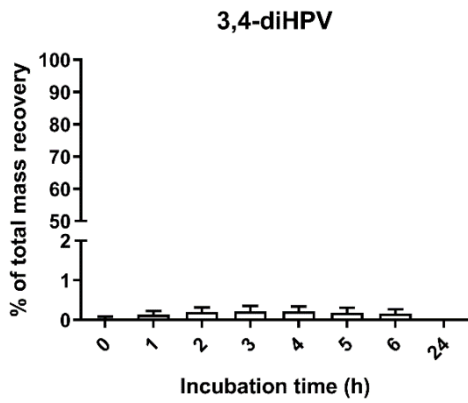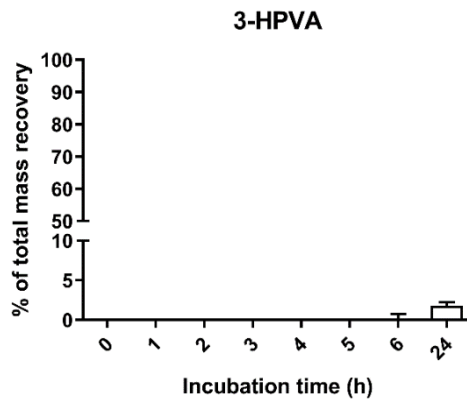

21

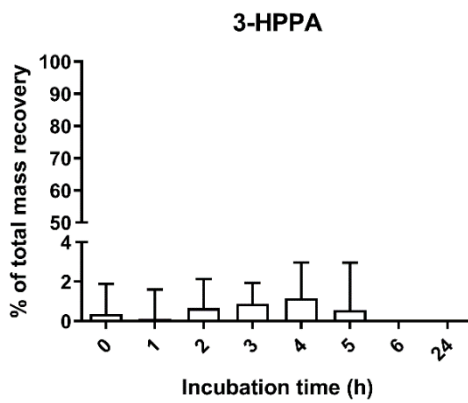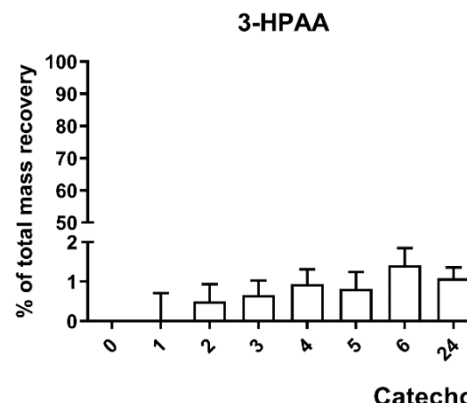

22

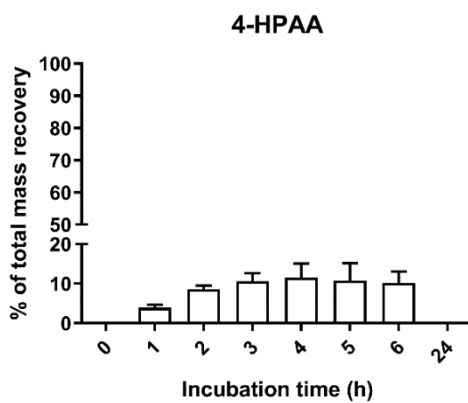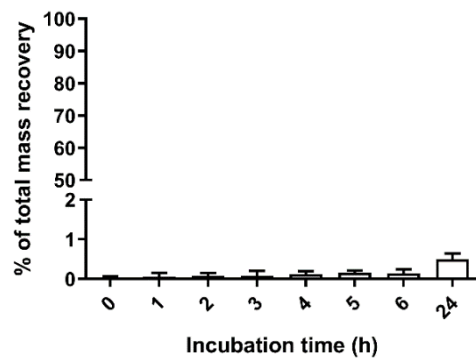

23

24 **Figure S2.** Phenolic compounds quantified in the negative control samples (without

25 adding EC in pooled faecal incubations) at different incubation timepoints. Results are

26 shown as mean  $\pm$  SD from 3 independent incubations.

27

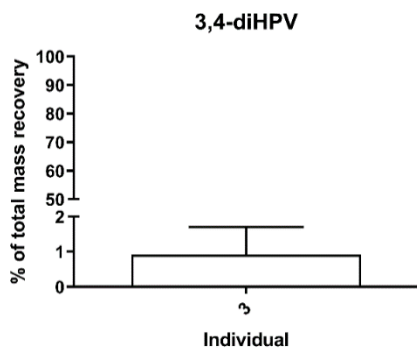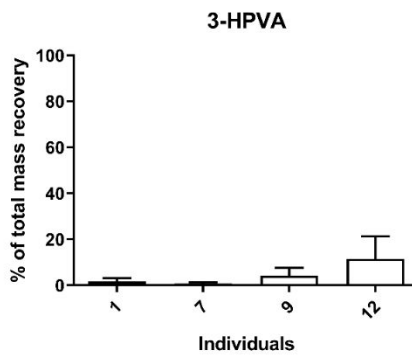

28

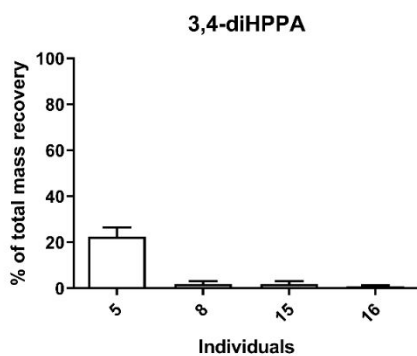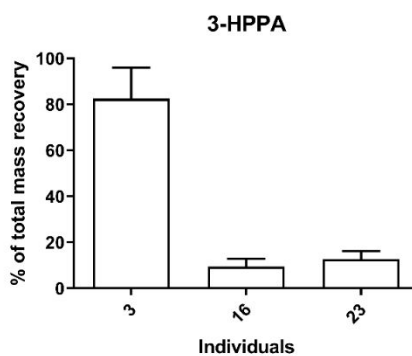

29

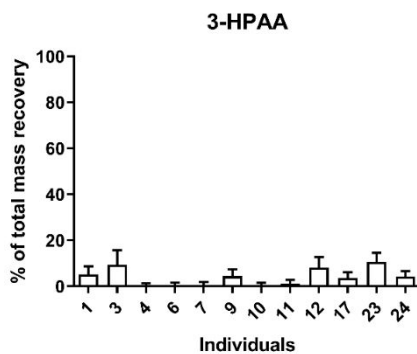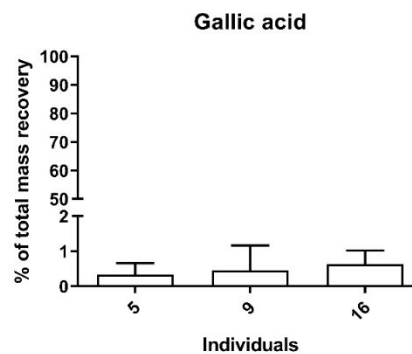

30

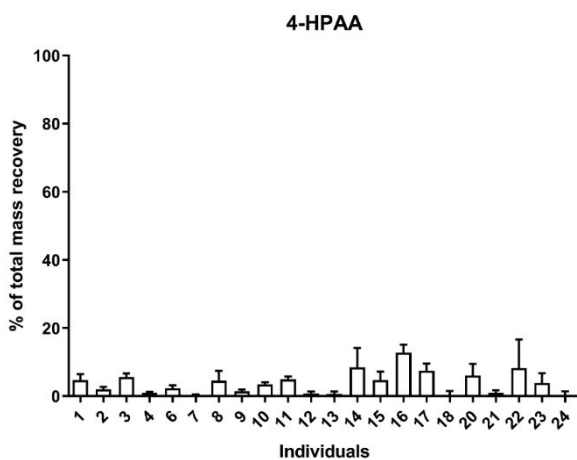

31

32 **Figure S3.** Phenolic compounds quantified in different individuals in the negative

33 control (without adding EC in individual faecal incubations) at 2 h of incubations.

34 Results are shown as mean  $\pm$  SD from 3 independent incubations. Values below the

35 LOD are not presented.

36

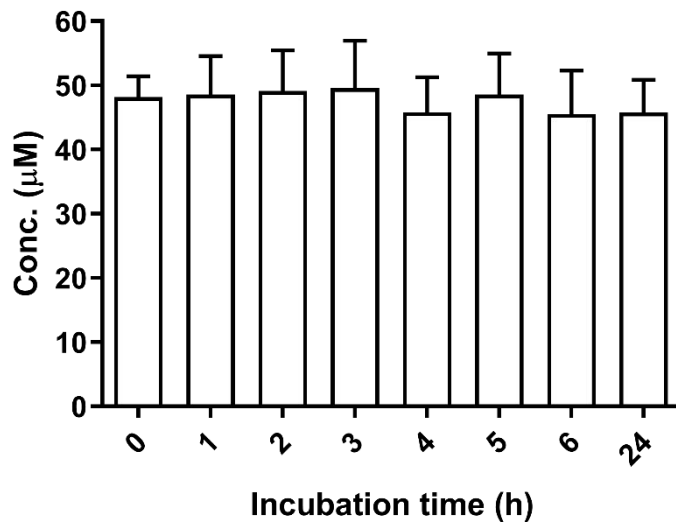

37

38 **Figure S4.** EC contents of blank control (incubated without faecal slurry) at different  
39 incubation timepoints. Results are shown as mean  $\pm$  SD from three independent  
40 incubations.

41





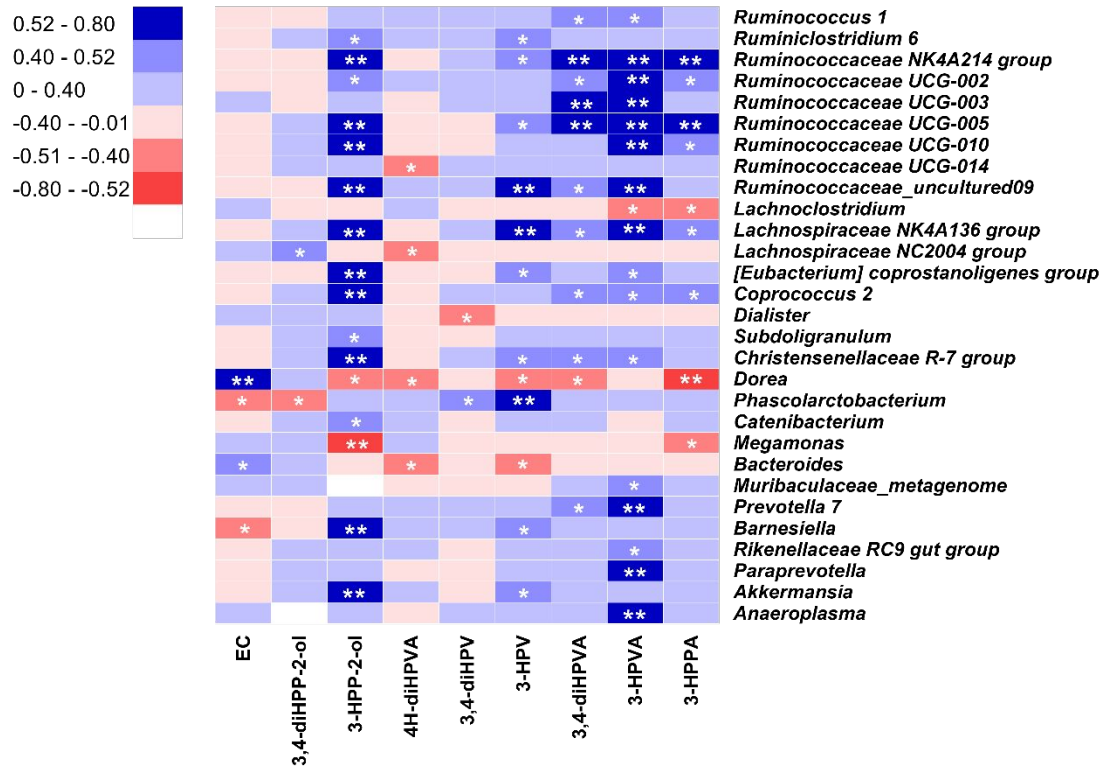

46

47 **Figure S6.** Spearman correlations between the taxon abundances of bacterial genera

48 and the concentration of residual EC and 8 EC microbial metabolites present in

49 incubations with faecal slurries from 24 individuals at 2 h. The sign and strength of the

50 Spearman correlation coefficients are represented as colours (blue: positive; red:

51 negative). The significances of the correlations are indicated by asterisks: \*P < 0.05,

52 \*\*P < 0.01.

53

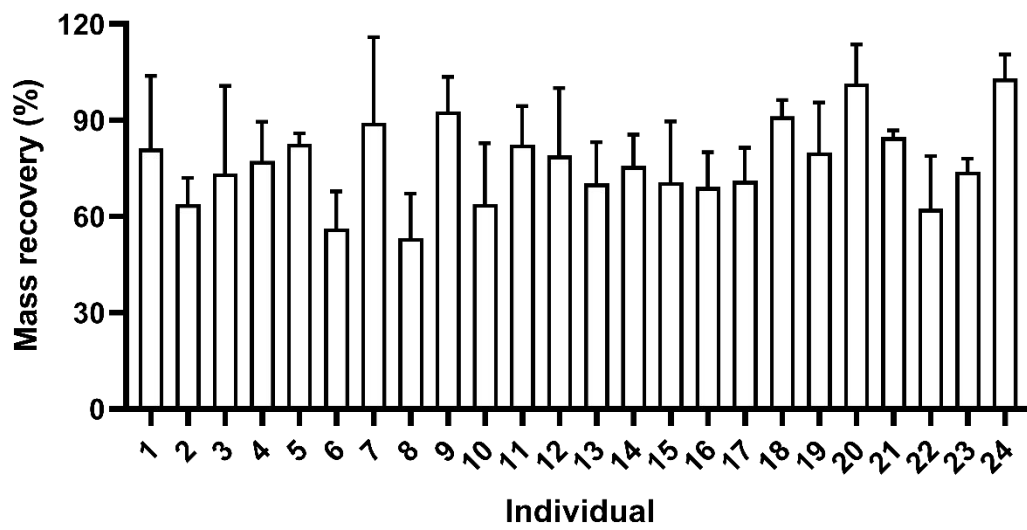

54

55 **Figure S7.** Total mass recoveries of 24 individuals for their EC faecal incubations at t  
 56 = 2 h. Results are shown as mean  $\pm$  SD from three independent incubations.

57

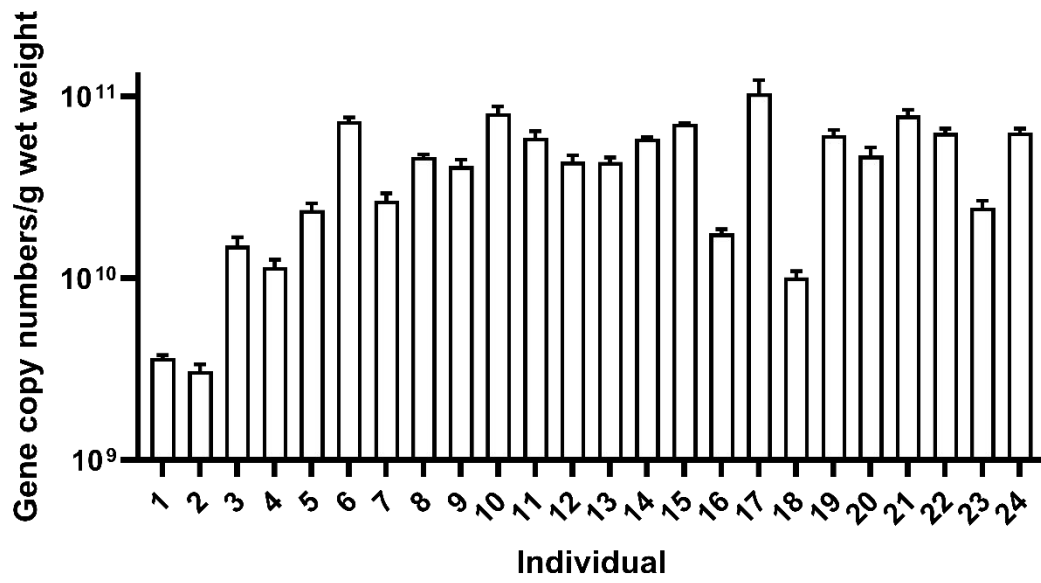

58

59 **Figure S8.** Bacterial load of 24 individuals, expressed as gene copy numbers per gram

60 of wet weight of faecal slurry (mean value  $\pm$  SD, n = 3)
